# Supplementary figures and images for: Distinct modes of recruitment of the CCR4–NOT complex by Drosophila and vertebrate Nanos
Source: PubMed Central journal article supplement — EMBO J. 2016 Mar 11;35(9):974–90. doi: 10.15252/embj.201593634 (PMC5207322; doi:10.15252/embj.201593634), 2016-03-11

Raisch et al. Fig. 1 Source Data

C

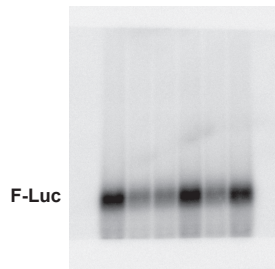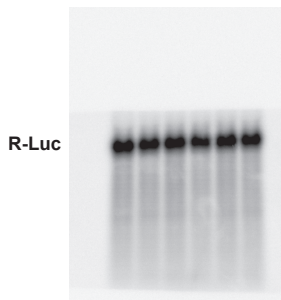

D

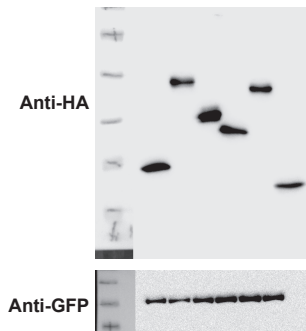

F

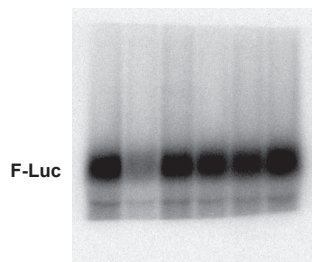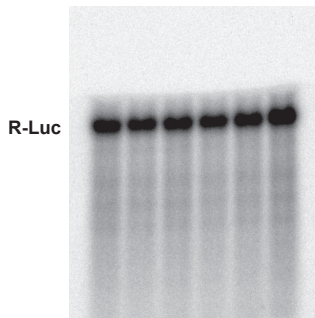

G

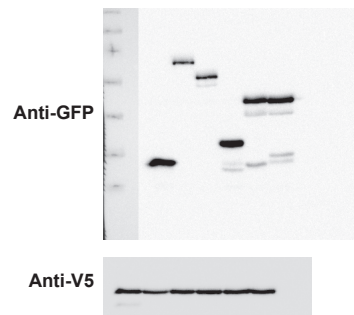

I

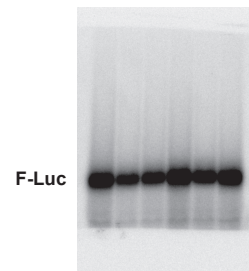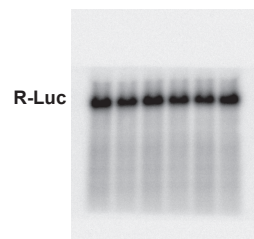

Supplement: EMBJ-35-974-s003.pdf [file EMBJ-35-974-s003.pdf]

Raisch et al. Fig. 2 Source Data

C

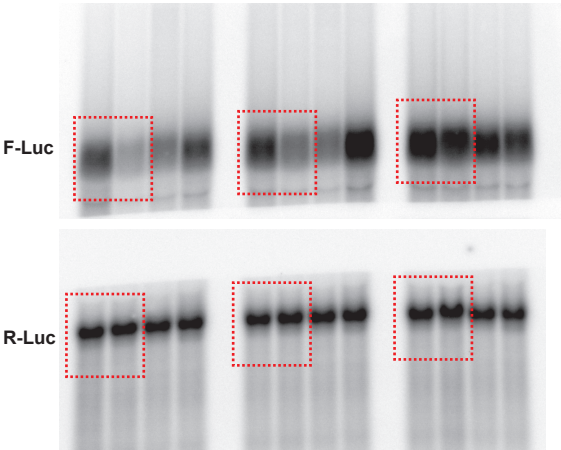

E

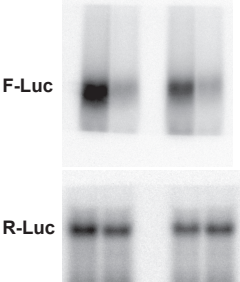

F

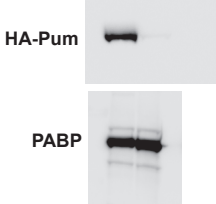

Supplement: EMBJ-35-974-s004.pdf [file EMBJ-35-974-s004.pdf]

Raisch et al. Fig. 3 Source Data

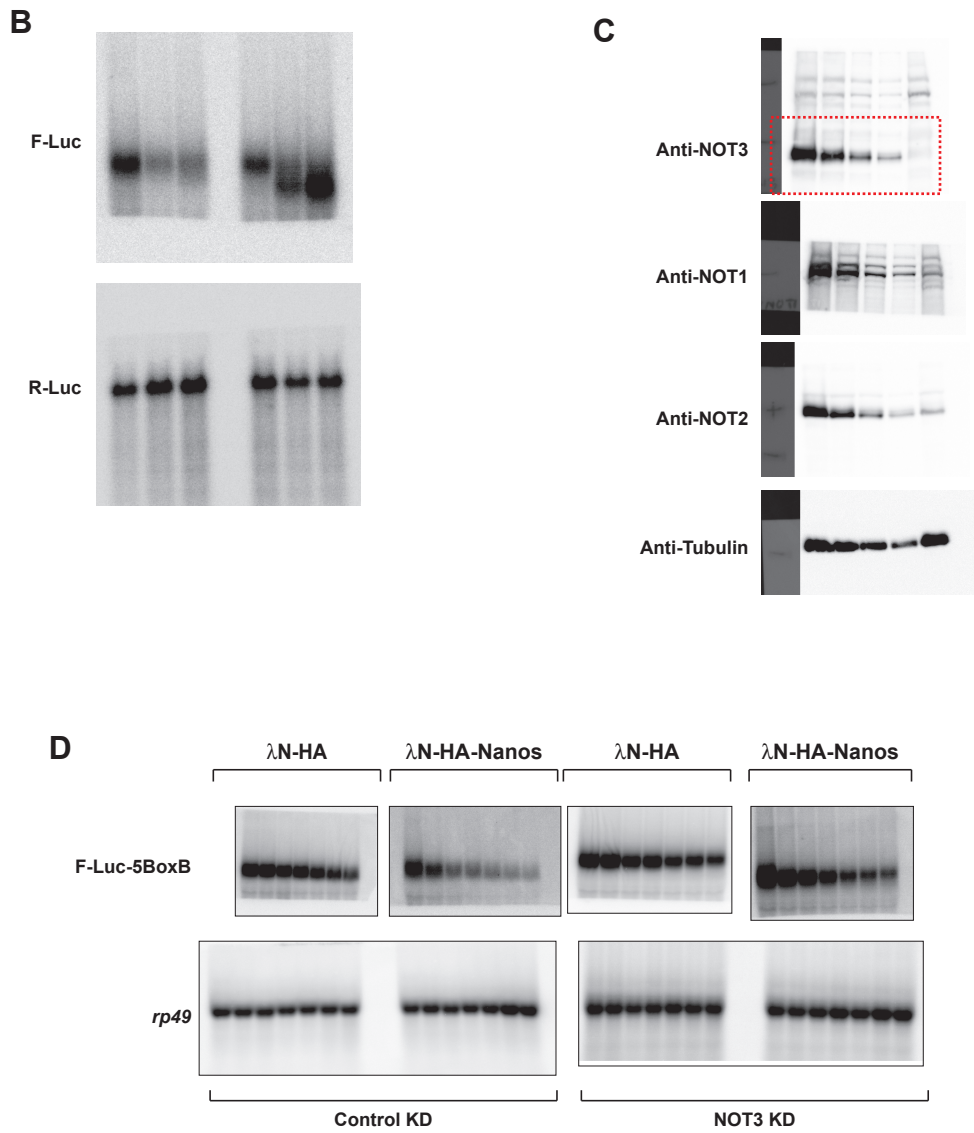

Supplement: EMBJ-35-974-s005.pdf [file EMBJ-35-974-s005.pdf]

Raisch et al. Fig. 4 Source Data

**A**

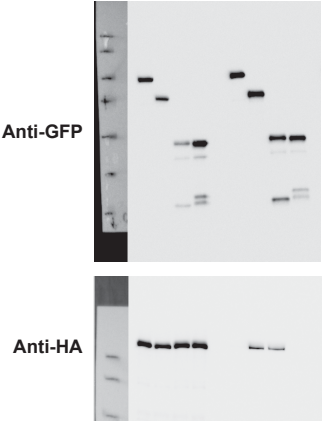

**B**

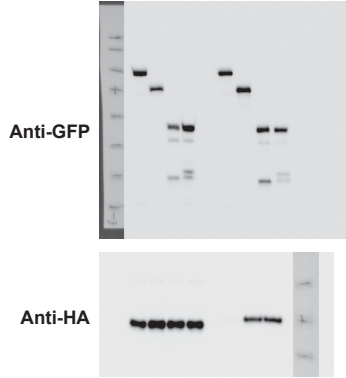

**C**

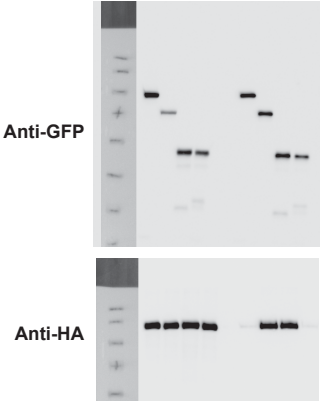

**D**

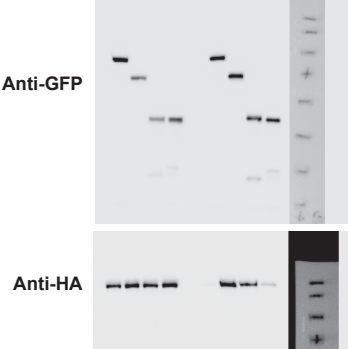

**E**

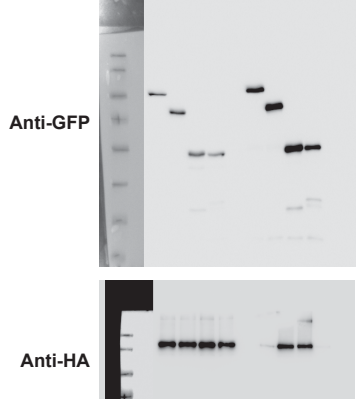

**F**

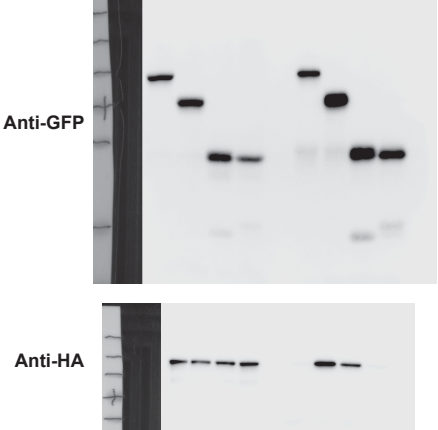

Supplement: EMBJ-35-974-s006.pdf [file EMBJ-35-974-s006.pdf]

Raisch et al. Fig. 5 Source Data

A

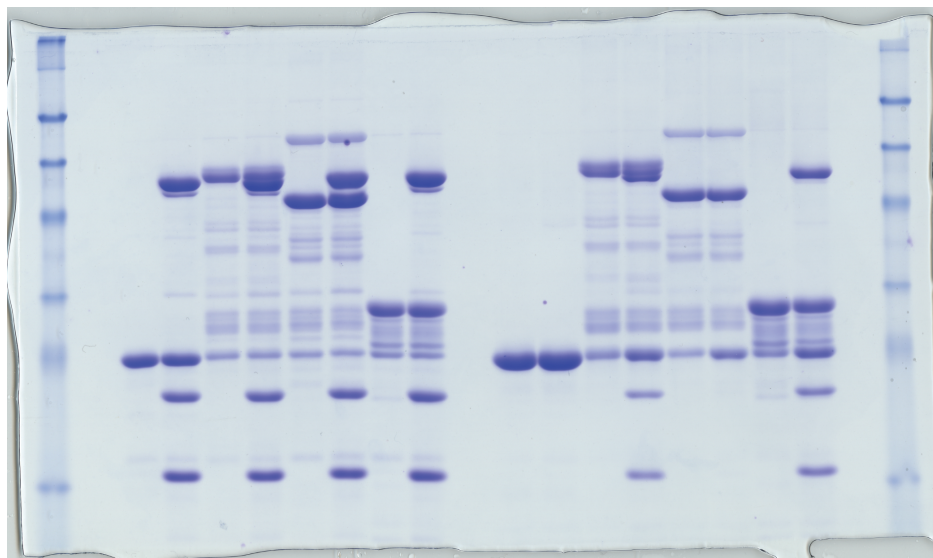

B

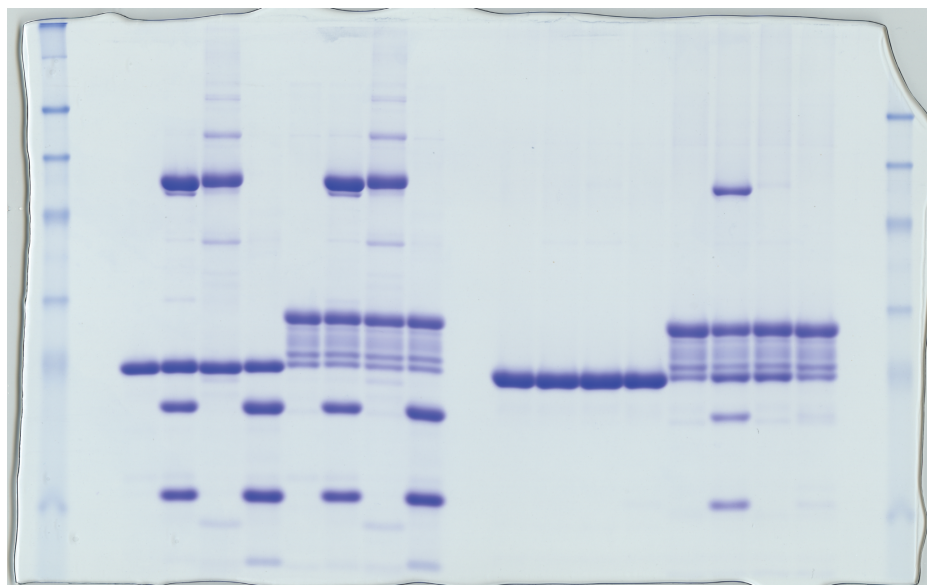

Supplement: EMBJ-35-974-s007.pdf [file EMBJ-35-974-s007.pdf]

Raisch et al. Fig. 7 Source Data

A

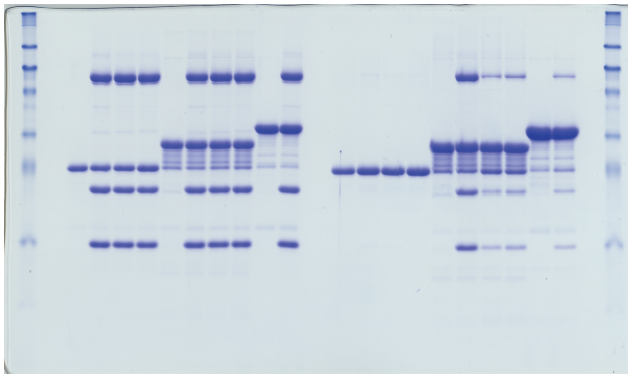

B

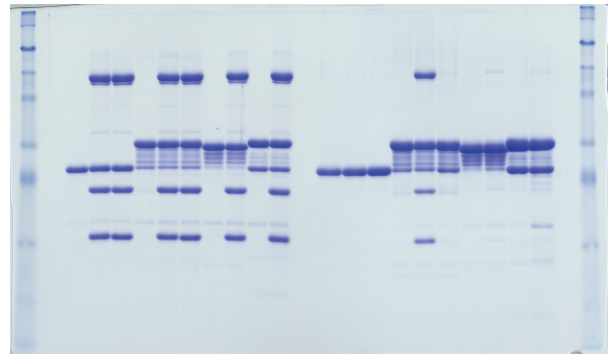

C

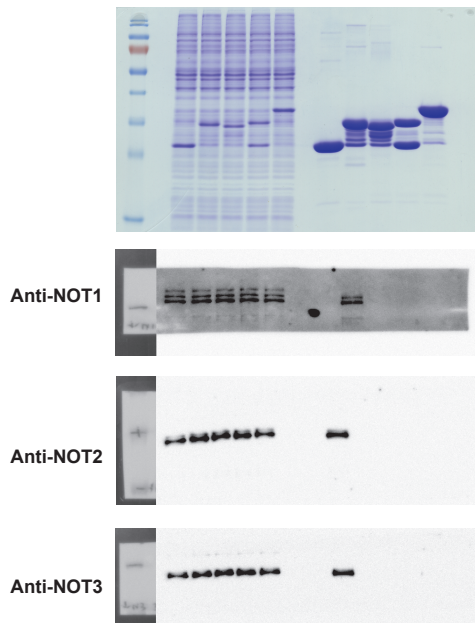

E

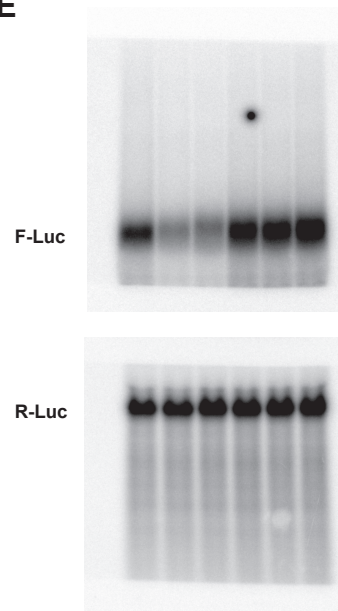

F

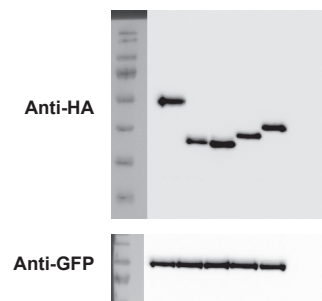

Supplement: EMBJ-35-974-s008.pdf [file EMBJ-35-974-s008.pdf]

Raisch et al. Fig.8 Source Data

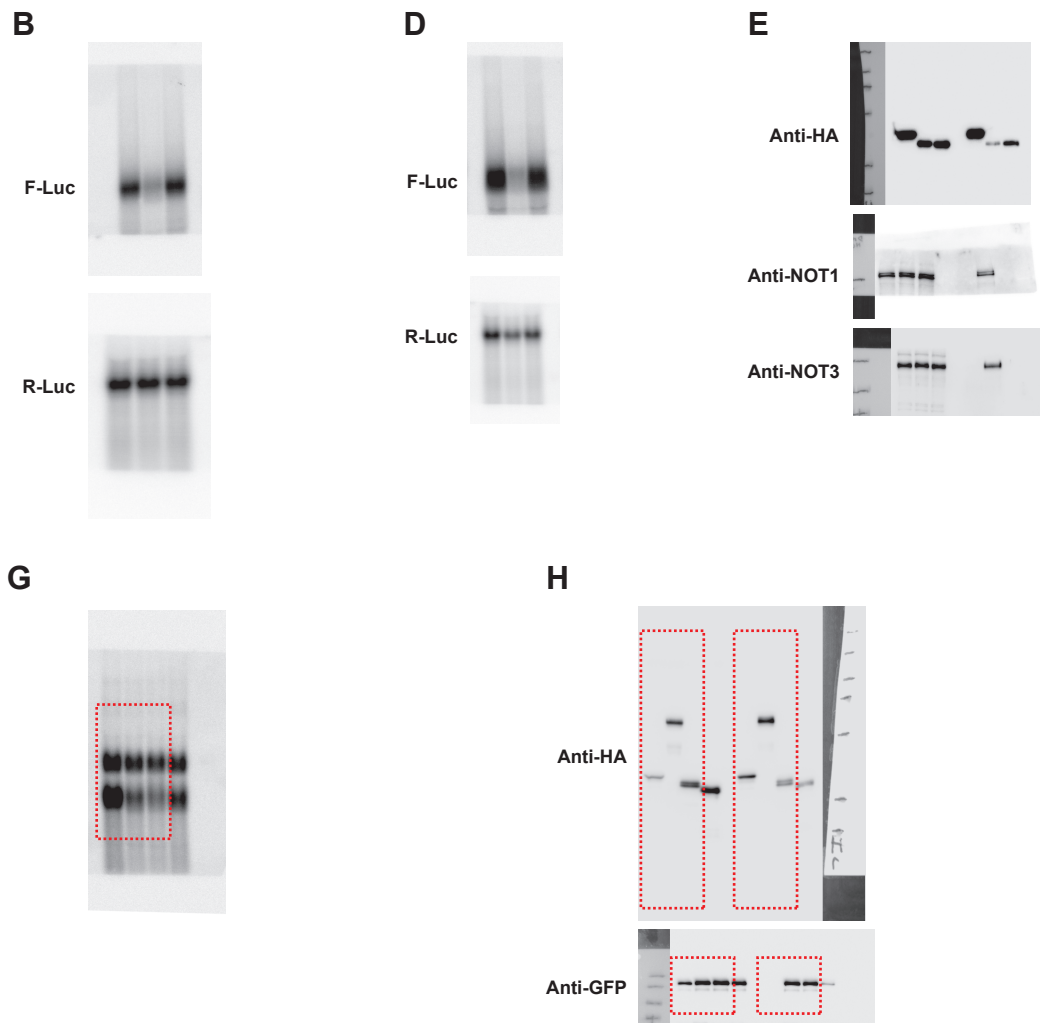

Supplement: EMBJ-35-974-s009.pdf [file EMBJ-35-974-s009.pdf]
